# Supplementary material
Source: publisher site journal article supplement (https://www.dovepress.com/article/567932)
Supplement: Supplementary file 1 [file Supplementary%20Table%201.docx]

**Supplementary Table 1: Canada’s Drug Agency reimbursement recommendations, 2020-2024**

|  |  |  | **Canada’s Drug Agency** | | |
| --- | --- | --- | --- | --- | --- |
| **Generic name** | **Brand name** | **Indication** | **Submission** | **Recommendation** | |
|  |  |  | **date** | **date** | **outcome** |
| Pembrolizumab | Keytruda | Squamous NSCLC | 08-02-2019 | 03-01-2020 | RCCC |
| Trastuzumab emtansine | Kadcyla | Breast cancer | 02-07-2019 | 22-01-2020 | R |
| Glucagon | Baqsimi | Severe hypoglycemic reactions | 24-07-2019 | 22-01-2020 | RCCC |
| Cemiplimab | Libtayo | Cutaneous squamous cell carcinoma | 09-07-2019 | 22-01-2020 | RCCC |
| Atezolizumab | Tecentriq | Small-cell lung cancer | 04-03-2019 | 30-01-2020 | DNR |
| Lorlatinib | Lorbrena | NSCLC | 11-06-2019 | 30-01-2020 | DNR |
| Upadacitinib | Rinvoq | Rheumatoid arthritis | 04-07-2019 | 04-02-2020 | RCCC |
| Vortioxetine | Trintellix | Major depressive disorder | 01-05-2019 | 12-02-2020 | RCCC |
| Tafamidis | Vyndaqel | Transthyretin-mediated amyloidosis | 04-07-2019 | 19-02-2020 | RCCC |
| Daratumumab | Darzalex | Multiple myeloma | 17-07-2019 | 05-03-2020 | RCCC |
| Trifluridine/tipiracil | Lonsurf | Gastric cancer | 03-09-2019 | 24-03-2020 | RCCC |
| Ixekizumab | Taltz | Ankylosing spondylitis | 20-09-2019 | 24-03-2020 | RCCC |
| Sodium zirconium cyclosilicate | Lokelma | Hyperkalemia | 17-05-2019 | 25-03-2020 | DNR |
| Safinamide | Onstryv | Parkinson's disease | 29-05-2019 | 25-03-2020 | DNR |
| Iron isomaltoside | Monoferric | Iron deficiency anemia | 26-06-2019 | 25-03-2020 | RCCC |
| Midostaurin | Rydapt | Systemic mastocytosis | 13-08-2019 | 02-04-2020 | DNR |
| Gemtuzumab ozogamicin | Mylotarg | Acute myeloid leukemia | 09-08-2019 | 02-04-2020 | R |
| Pembrolizumab | Keytruda | Renal cell carcinoma | 02-08-2019 | 02-04-2020 | RCCC |
| Belimumab | Benlysta | Systemic lupus erythematosus | 29-05-2019 | 22-04-2020 | DNR |
| Cabozantinib | Cabometyx | Hepatocellular carcinoma | 16-10-2019 | 22-04-2020 | RCCC |
| Dupilumab | Dupixent | Atopic dermatitis | 22-10-2019 | 22-04-2020 | RCCC |
| Apalutamide | Erleada | CSPC | 15-10-2019 | 22-04-2020 | RCCC |
| Ribociclib | Kisqali | HR+ HER2- breast cancer | 26-08-2019 | 22-04-2020 | RCCC |
| Darolutamide | Nubeqa | CRPC | 27-08-2019 | 22-04-2020 | RCCC |
| Vedolizumab | Entyvio | Ulcerative colitis | 21-11-2019 | 19-05-2020 | RCCC |
| Gilteritinib | Xospata | Acute myeloid leukemia | 28-10-2019 | 20-05-2020 | RCCC |
| Brolucizumab | Beovu | Macular degeneration | 26-09-2019 | 21-05-2020 | RCCC |
| Naltrexone/bupropion | Contrave | Chronic weight management | 01-05-2019 | 27-05-2020 | DNR |
| Burosumab | Crysvita | X-linked hypophosphatemia | 23-07-2019 | 27-05-2020 | RCCC |
| Brentuximab | Adcetris | Peripheral T-cell lymphoma | 08-10-2019 | 04-06-2020 | R |
| Ribociclib | Kisqali | HR+ HER2- breast cancer | 26-08-2019 | 04-06-2020 | RCCC |
| Glycopyrrolate | Cuvposa | Chronic severe drooling | 31-05-2019 | 24-06-2020 | DNR |
| Atezolizumab/bevacizumab | Tecentriq/Avastin | Non-squamous NSCLC | 18-11-2019 | 03-07-2020 | DNR |
| Ustekinumab | Stelara | Ulcerative colitis | 12-08-2019 | 16-07-2020 | RCCC |
| Icosapent ethyl | Vascepa | Ischemic events | 17-06-2019 | 16-07-2020 | RCCC |
| Siponimod | Mayzent | Secondary progressive multiple sclerosis | 26-09-2019 | 21-07-2020 | RCCC |
| Erenumab | Aimovig | Migraine | 02-05-2019 | 22-07-2020 | RCCC |
| Cabotegravir/rilpivirine | Vocabria/Cabenuva | HIV-1 | 19-08-2019 | 22-07-2020 | RCCC |
| Eculizumab | Soliris | NMOSD | 25-02-2020 | 19-08-2020 | RCCC |
| Caplacizumab | Cablivi | TTP | 13-09-2019 | 26-08-2020 | DNR |
| Niraparib | Zejula | Ovarian cancer | 07-02-2020 | 03-09-2020 | RCCC |
| Enzalutamide | Xtandi | CSPC | 24-02-2020 | 23-09-2020 | RCCC |
| Eculizumab | Soliris | Myasthenia gravis | 01-04-2020 | 19-10-2020 | RCCC |
| Etonogestrel | Nexplanon | Pregnancy prevention | 03-06-2020 | 20-10-2020 | RCCC |
| Halobetasol propionate/ tazarotene | Duobrii | Plaque psoriasis | 24-01-2020 | 28-10-2020 | RCCC |
| Budesonide | Jorveza | Eosinophilic esophagitis | 08-11-2019 | 28-10-2020 | RCCC |
| Blinatumomab | Blincyto | MRD+ acute lymphoblastic leukemia | 20-01-2020 | 29-10-2020 | RCCC |
| Voretigene neparvovec | Luxturna | Inherited retinal dystrophy | 23-04-2020 | 12-11-2020 | RCCC |
| Acalabrutinib | Calquence | Chronic lymphocytic leukemia | 07-04-2020 | 17-11-2020 | RCCC |
| Atezolizumab/bevacizumab | Tecentriq/Avastin | Hepatocellular carcinoma | 21-05-2020 | 17-11-2020 | RCCC |
| Venetoclax | Venclexta | Chronic lymphocytic leukemia | 17-04-2020 | 17-11-2020 | RCCC |
| Indacaterol/mometasone | Atectura Breezhaler | Asthma | 19-05-2020 | 24-11-2020 | RCCC |
| Indacaterol/glycopyrronium/ mometasone | Enerzair Breezhaler | Asthma | 19-05-2020 | 24-11-2020 | RCCC |
| Brentuximab | Adcetris | Cutaneous anaplastic large cell lymphoma/ CD30-expressing mycosis fungoides | 30-03-2020 | 03-12-2020 | RCCC |
| Esketamine | Spravato | Major depressive disorder | 24-06-2019 | 16-12-2020 | DNR |
| Emicizumab | Hemlibra | Hemophilia A | 30-06-2020 | 21-12-2020 | RCCC |
| Pembrolizumab | Keytruda | Head and neck squamous cell carcinoma | 01-05-2020 | 22-12-2020 | RCCC |
| Dapagliflozin | Forxiga | Heart failure | 31-03-2020 | 23-12-2020 | RCCC |
| Glasdegib | Daurismo | Acute myeloid leukemia | 06-05-2020 | 08-01-2021 | DNR |
| Acalabrutinib | Calquence | Chronic lymphocytic leukemia | 07-04-2020 | 08-01-2021 | RCCC |
| Vedolizumab | Entyvio | Crohn's disease | 23-07-2020 | 21-01-2021 | RCCC |
| Entrectinib | Rozlytrek | ROS1+ NSCLC | 08-01-2020 | 27-01-2021 | RCCC |
| Levetiracetam | pdp-levETIRAcetam | Epilepsy | 17-07-2020 | 03-02-2021 | RCCC |
| Apomorphine | Kynmobi | Parkinson's disease | 25-06-2020 | 24-02-2021 | RCCC |
| Nintedanib | Ofev | Chronic fibrosing interstitial lung disease | 24-07-2020 | 24-02-2021 | RCCC |
| Ofatumumab | Kesimpta | Multiple sclerosis | 25-08-2020 | 25-02-2021 | RCCC |
| Nivolumab/ipilimumab | Opdivo/Yervoy | NSCLC | 23-06-2020 | 04-03-2021 | RCCC |
| Von Willebrand factor | Vonvendi | Von Willebrand disease | 29-04-2020 | 17-03-2021 | RCCC |
| Avelumab | Bavencio | Urothelial carcinoma | 18-09-2020 | 23-03-2021 | RCCC |
| Fremanezumab | Ajovy | Migraine | 03-06-2020 | 24-03-2021 | RCCC |
| Sacubitril/valsartan | Entresto | Heart failure, NYHA II or III | 22-05-2020 | 24-03-2021 | RCCC |
| Onasemnogene abeparvovec | Zolgensma | Spinal muscular atrophy | 25-06-2020 | 24-03-2021 | RCCC |
| Isatuximab | Sarclisa | Multiple myeloma | 17-08-2020 | 01-04-2021 | RCCC |
| Amifampridine | Ruzurgi | Lambert-Eaton syndrome | 05-10-2020 | 20-04-2021 | RCCC |
| Satralizumab | Enspryng | NMOSD | 22-10-2020 | 21-04-2021 | RCCC |
| Brigatinib | Alunbrig | ALK+ NSCLC | 30-09-2020 | 21-04-2021 | RCCC |
| Olaparib | Lynparza | CRPC | 22-09-2020 | 21-04-2021 | RCCC |
| Polatuzumab | Polivy | Diffuse large B-cell lymphoma | 29-09-2020 | 21-04-2021 | RCCC |
| Infliximab | Remsima | Rheumatoid arthritis | 24-09-2020 | 22-04-2021 | RCCC |
| Sonidegib | Odomzo | Basal cell carcinoma | 19-06-2020 | 29-04-2021 | DNR |
| Niraparib | Zejula | Ovarian cancer | 21-09-2020 | 29-04-2021 | RCCC |
| Ranolazine | Corzyna | Stable angina pectoris | 17-08-2020 | 27-05-2021 | DNR |
| Dabrafenib/trametinib | Tafinlar/Mekinist | BRAF V600 NSCLC | 01-10-2020 | 28-05-2021 | RCCC |
| Dupilumab | Dupixent | Asthma | 26-11-2020 | 08-06-2021 | RCCC |
| Luspatercept | Reblozyl | Beta-thalassemia associated anemia | 26-11-2020 | 08-06-2021 | RCCC |
| Semaglutide | Rybelsus | Diabetes mellitus, type 2 | 26-11-2020 | 08-06-2021 | RCCC |
| Patiromer | Veltassa | Hyperkalemia | 30-10-2020 | 08-06-2021 | RCCC |
| Tildrakizumab | Ilumya | Plaque psoriasis | 15-07-2019 | 21-06-2021 | RCCC |
| Fedratinib | Inrebic | Myelofibrosis | 05-11-2020 | 21-06-2021 | RCCC |
| Ozanimod | Zeposia | Multiple sclerosis | 25-08-2020 | 23-06-2021 | DNR |
| Dinutuximab | Unituxin | Neuroblastoma | 23-11-2020 | 23-07-2021 | RCCC |
| Encorafenib | Braftovi | Colorectal cancer | 16-12-2020 | 26-07-2021 | RCCC |
| Encorafenib/binimetinib | Braftovi/Mektovi | Advanced melanoma | 16-12-2020 | 26-07-2021 | RCCC |
| Durvalumab | Imfinzi | Small-cell lung cancer | 01-12-2020 | 27-07-2021 | RCCC |
| Pembrolizumab | Keytruda | Colorectal cancer | 30-11-2020 | 27-07-2021 | RCCC |
| Nivolumab/ipilimumab | Opdivo/Yervoy | Malignant pleural mesothelioma | 09-10-2020 | 04-08-2021 | RCCC |
| Upadacitinib | Rinvoq | Psoriatic arthritis | 04-01-2021 | 20-08-2021 | RCCC |
| Venetoclax | Venclexta | Acute myeloid leukemia | 08-01-2021 | 20-08-2021 | RCCC |
| Venetoclax | Venclexta | Acute myeloid leukemia | 22-01-2021 | 23-08-2021 | DNR |
| Human insulin | Entuzity KwikPen | Diabetes mellitus | 27-01-2021 | 23-08-2021 | RCCC |
| Budesonide | Jorveza | Eosinophilic esophagitis | 05-11-2020 | 23-08-2021 | RCCC |
| Brexucabtagene autoleucel | Tecartus | Mantle cell lymphoma | 18-12-2020 | 24-08-2021 | RCCC |
| Daunorubicin/cytarabine | Vyxeos | Acute myeloid leukemia | 22-01-2021 | 24-08-2021 | RCCC |
| Risdiplam | Evrysdi | Spinal muscular atrophy | 19-11-2020 | 26-08-2021 | RCCC |
| Liraglutide | Saxenda | Chronic weight management | 23-12-2020 | 01-09-2021 | DNR |
| Givosiran | Givlaari | Acute hepatic porphyria | 23-02-2021 | 08-09-2021 | RCCC |
| Risperidone | Perseris | Schizophrenia | 29-01-2021 | 08-09-2021 | RCCC |
| Incobotulinumtoxin A | Xeomin | Chronic sialorrhea | 26-02-2021 | 09-09-2021 | RCCC |
| Larotrectinib | Vitrakvi | NTRK gene fusion solid tumours | 16-11-2020 | 13-09-2021 | RCCC |
| Budesonide/glycopyrronium/ formoterol | Breztri Aerosphere | Chronic obstructive pulmonary disease | 28-01-2021 | 14-09-2021 | RCCC |
| Elexacaftor/tezacaftor/ivacaftor & ivacaftor | Trikafta | CF, F508del mutation, 12 years & older | 22-01-2021 | 16-09-2021 | RCCC |
| Decitabine/cedazuridine | Inqovi | Myelodysplastic syndrome | 09-10-2020 | 22-09-2021 | RCCC |
| Azacitidine | Onureg | Acute myeloid leukemia | 01-03-2021 | 20-10-2021 | RCCC |
| Pembrolizumab | Keytruda | Hodgkin lymphoma | 29-01-2021 | 01-11-2021 | RCCC |
| Romosozumab | Evenity | Osteoporosis | 01-02-2021 | 11-11-2021 | RCCC |
| Trientine | MAR-Trientine | Wilson's disease | 19-04-2021 | 11-11-2021 | RCCC |
| Idecabtagene vicleucel | Abecma | Multiple myeloma | 16-12-2020 | 12-11-2021 | DNR |
| Tucatinib | Tukysa | Breast cancer | 26-03-2021 | 17-11-2021 | RCCC |
| Chlormethine | Ledaga | T-cell lymphoma | 21-12-2020 | 24-11-2021 | DNR |
| Luspatercept | Reblozyl | Myelodysplastic syndrome anemia | 28-01-2021 | 07-12-2021 | RCCC |
| Macitentan/tadalafil | Opsynvi | Pulmonary arterial hypertension | 20-05-2021 | 14-12-2021 | RCCC |
| Galcanezumab | Emgality | Migraine | 03-06-2021 | 15-12-2021 | RCCC |
| Pembrolizumab | Keytruda | EGEJ cancer | 26-05-2021 | 20-12-2021 | RCCC |
| Zanubrutinib | Brukinsa | Waldenstrom’s macroglobulinemia | 21-05-2021 | 21-12-2021 | RCCC |
| Enfortumab | Padcev | Urothelial carcinoma | 23-06-2021 | 06-01-2022 | RCCC |
| Osimertinib | Tagrisso | NSCLC | 24-03-2021 | 10-01-2022 | RCCC |
| Estradiol | Imvexxy | Dyspareunia | 23-06-2021 | 20-01-2022 | RCCC |
| Triheptanoin | Dojolvi | Long-chain fatty acid oxidation disorders | 31-03-2021 | 21-01-2022 | RCCC |
| Mecasermin | Increlex | Primary insulin-like growth factor-1 deficiency | 14-06-2021 | 21-01-2022 | RCCC |
| Pertuzumab | Perjeta | Breast cancer | 14-04-2021 | 25-01-2022 | DNR |
| Alpelisib | Piqray | Breast cancer | 21-04-2021 | 26-01-2022 | DNR |
| Nivolumab | Opdivo | EGEJ cancer | 07-07-2021 | 26-01-2022 | RCCC |
| Sacituzumab govitecan | Trodelvy | Triple-negative breast cancer | 30-06-2021 | 27-01-2022 | RCCC |
| Daratumumab | Darzalex | Light chain amyloidosis | 15-07-2021 | 28-01-2022 | RCCC |
| Isatuximab | Sarclisa | Multiple myeloma | 15-07-2021 | 28-01-2022 | RCCC |
| Inclisiran | Leqvio | Primary hypercholesterolemia | 17-03-2021 | 07-02-2022 | DNR |
| Trientine | Waymade-Trientine | Wilson's disease | 21-07-2021 | 08-02-2022 | RCCC |
| Estradiol/progesterone | Bijuva | Menopause vasomotor symptoms | 30-06-2021 | 10-02-2022 | RCCC |
| Ravulizumab | Ultomiris | PNH | 22-07-2021 | 11-02-2022 | RCCC |
| Cemiplimab | Libtayo | Basal cell carcinoma | 19-08-2021 | 04-03-2022 | RCCC |
| Nivolumab | Opdivo | EGEJ cancer | 18-08-2021 | 04-03-2022 | RCCC |
| Tralokinumab | Adtralza | Atopic dermatitis | 27-04-2021 | 07-03-2022 | DNR |
| Colchicine | Myinfla | Atherothrombotic events | 28-05-2021 | 08-03-2022 | DNR |
| Somatrogon | Ngenla | Growth hormone deficiency | 03-06-2021 | 08-03-2022 | RCCC |
| Lorlatinib | Lorbrena | ALK+ NSCLC | 18-06-2021 | 17-03-2022 | RCCC |
| Pemigatinib | Pemazyre | Cholangiocarcinoma | 23-06-2021 | 23-03-2022 | DNR |
| Bimekizumab | Bimzelx | Plaque psoriasis | 17-08-2021 | 30-03-2022 | RCCC |
| Fostamatinib | Tavalisse | Chronic immune thrombocytopenia | 22-07-2021 | 05-04-2022 | DNR |
| Alpha1-proteinase inhibitor | Zemaira | Alpha1-proteinase inhibitor deficiency | 01-10-2021 | 13-04-2022 | RCCC |
| Prasterone | Intrarosa | Postmenopausal vulvovaginal atrophy | 01-10-2021 | 14-04-2022 | RCCC |
| Ripretinib | Qinlock | Gastrointestinal stromal tumours | 15-10-2021 | 28-04-2022 | RCCC |
| Selpercatinib | Retevmo | RET+ NSCLC | 17-08-2021 | 28-04-2022 | RCCC |
| Ospemifene | Osphena | Dyspareunia | 26-10-2021 | 13-05-2022 | RCCC |
| Cemiplimab | Libtayo | NSCLC | 13-10-2021 | 02-06-2022 | RCCC |
| Upadacitinib | Rinvoq | Atopic dermatitis | 13-04-2021 | 08-06-2022 | RCCC |
| Immune globulin/recombinant human hyaluronidase | HyQvia | Humoral immunodeficiency | 24-06-2021 | 15-06-2022 | RCCC |
| Amifampridine phosphate | Firdapse | Lambert-Eaton syndrome | 15-11-2021 | 16-06-2022 | RCCC |
| Elexacaftor/tezacaftor/ivacaftor & ivacaftor | Trikafta | CF, F508del mutation, 6 years & older | 05-11-2021 | 17-06-2022 | RCCC |
| Cenegermin | Oxervate | Neurotrophic keratitis | 29-10-2021 | 23-06-2022 | RCCC |
| Lenvatinib/pembrolizumab | Lenvima/Keytruda | Renal cell carcinoma | 15-11-2021 | 23-06-2022 | RCCC |
| Lisocabtagene maraleucel | Breyanzi | Large B-cell lymphoma | 09-08-2021 | 29-06-2022 | RCCC |
| Selpercatinib | Retevmo | Thyroid cancer | 29-10-2021 | 29-06-2022 | RCCC |
| Avalglucosidase alfa | Nexviazyme | Pompe disease | 30-09-2021 | 05-07-2022 | RCCC |
| Ruxolitinib | Jakavi | Graft versus host disease | 10-08-2021 | 15-07-2022 | RCCC |
| Sodium phenylbutyrate/ ursodoxicoltaurine | Albrioza | Amyotrophic lateral sclerosis | 24-11-2021 | 21-07-2022 | RCCC |
| Zanubrutinib | Brukinsa | Mantle cell lymphoma | 30-09-2021 | 27-07-2022 | DNR |
| Selinexor | Xpovio | Multiple myeloma | 14-01-2022 | 29-07-2022 | RCCC |
| Asciminib | Scemblix | Ph+ chronic myeloid leukemia | 20-01-2022 | 05-08-2022 | RCCC |
| Nusinersen | Spinraza | Spinal muscular atrophy | 02-12-2021 | 11-08-2022 | DNR |
| Faricimab | Vabysmo | Macular degeneration | 31-01-2022 | 12-08-2022 | RCCC |
| Mogamulizumab | Poteligeo | Mycosis fungoides/Sézary syndrome | 13-09-2021 | 12-08-2022 | RCCC |
| Abrocitinib | Cibinqo | Atopic dermatitis | 26-04-2021 | 19-08-2022 | RCCC |
| Dostarlimab | Jemperli | Endometrial cancer | 07-10-2021 | 24-08-2022 | DNR |
| Tepotinib | Tepmetko | NSCLC | 30-08-2021 | 24-08-2022 | DNR |
| Pembrolizumab | Keytruda | Triple-negative breast cancer | 17-02-2022 | 31-08-2022 | RCCC |
| Atezolizumab | Tecentriq | NSCLC | 24-02-2022 | 01-09-2022 | RCCC |
| Atezolizumab | Tecentriq | Small-cell lung cancer | 24-01-2022 | 01-09-2022 | RCCC |
| Pembrolizumab/lenvatinib | Keytruda/Lenvima | Endometrial cancer | 07-03-2022 | 09-09-2022 | RCCC |
| Ruxolitinib | Jakavi | Graft versus host disease | 10-08-2021 | 15-09-2022 | RCCC |
| Semaglutide | Wegovy | Weight management | 10-03-2022 | 16-09-2022 | DNR |
| Selpercatinib | Retevmo | Thyroid cancer | 29-10-2021 | 26-09-2022 | RCCC |
| Trastuzumab deruxtecan | Enhertu | HER2+ breast cancer | 23-03-2022 | 28-09-2022 | RCCC |
| Lutetium oxodotreotide | Lutathera | GEP-NET | 23-03-2022 | 28-09-2022 | RCCC |
| Nivolumab | Opdivo | Urothelial carcinoma | 22-02-2022 | 28-09-2022 | RCCC |
| Tafasitamab | Minjuvi | Diffuse large B-cell lymphoma | 19-11-2021 | 29-09-2022 | DNR |
| Pralsetinib | Gavreto | RET+ NSCLC | 09-03-2022 | 29-09-2022 | RCCC |
| Pembrolizumab | Keytruda | Renal cell carcinoma | 03-03-2022 | 29-09-2022 | RCCC |
| Abemaciclib | Verzenio | HR+ HER2- breast cancer | 23-03-2022 | 29-09-2022 | RCCC |
| Empagliflozin | Jardiance | Heart failure | 06-04-2022 | 14-10-2022 | RCCC |
| Faricimab | Vabysmo | Diabetic macular edema | 24-03-2022 | 14-10-2022 | RCCC |
| Cabozantinib | Cabometyx | Differentiated thyroid carcinoma | 27-04-2022 | 02-11-2022 | RCCC |
| Entrectinib | Rozlytrek | NTRK gene fusion extracranial solid tumours | 25-01-2022 | 03-11-2022 | RCCC |
| Maribavir | Livtencity | Post-transplant cytomegalovirus infection | 31-03-2022 | 04-11-2022 | RCCC |
| Pembrolizumab | Keytruda | Melanoma | 26-04-2022 | 04-11-2022 | RCCC |
| Cariprazine | Vraylar | Bipolar disorder | 28-01-2022 | 09-11-2022 | DNR |
| Pegvaliase | Palynziq | Phenylketonuria | 22-12-2021 | 09-11-2022 | RCCC |
| Mepolizumab | Nucala | Severe chronic rhinosinusitis | 11-05-2022 | 16-11-2022 | RCCC |
| Tezepelumab | Tezspire | Asthma | 14-04-2022 | 16-11-2022 | RCCC |
| Dalbavancin | Xydalba | Bacterial skin infections | 11-04-2022 | 16-11-2022 | RCCC |
| Guselkumab | Tremfya | Psoriatic arthritis | 02-05-2022 | 17-11-2022 | RCCC |
| Ozanimod | Zeposia | Ulcerative colitis | 05-01-2022 | 17-11-2022 | RCCC |
| Pembrolizumab | Keytruda | Cervical cancer | 20-05-2022 | 01-12-2022 | RCCC |
| Pitolisant | Wakix | Narcolepsy | 08-12-2021 | 06-12-2022 | DNR |
| Dexamethasone implant | Ozurdex | Diabetic macular edema | 08-06-2022 | 13-12-2022 | DNR |
| Eptinezumab | Vyepti | Migraine | 08-06-2022 | 15-12-2022 | RCCC |
| Lurbinectedin | Zepzelca | Small-cell lung cancer | 24-02-2022 | 19-12-2022 | DNR |
| Edaravone | Radicava | Amyotrophic lateral sclerosis | 10-03-2022 | 22-12-2022 | RCCC |
| Tebentafusp | Kimmtrak | Uveal melanoma | 21-04-2022 | 04-01-2023 | RCCC |
| Darolutamide | Nubeqa | CSPC | 16-06-2022 | 05-01-2023 | RCCC |
| Pembrolizumab | Keytruda | Triple-negative breast cancer | 20-06-2022 | 06-01-2023 | RCCC |
| Lemborexant | Dayvigo | Insomnia | 28-02-2022 | 10-01-2023 | DNR |
| Brolucizumab | Beovu | Diabetic macular edema | 30-06-2022 | 18-01-2023 | RCCC |
| Belimumab | Benlysta | Lupus nephritis | 07-07-2022 | 19-01-2023 | RCCC |
| Deferiprone | Ferriprox | Transfusion iron overload | 08-06-2022 | 19-01-2023 | RCCC |
| Dupilumab | Dupixent | Asthma | 28-06-2022 | 20-01-2023 | RCCC |
| Anifrolumab | Saphnelo | Systemic lupus erythematosus | 28-01-2022 | 20-01-2023 | RCCC |
| Pembrolizumab | Keytruda | Endometrial cancer | 15-12-2021 | 03-02-2023 | RCCC |
| Durvalumab | Imfinzi | Biliary tract cancer | 14-07-2022 | 03-02-2023 | RCCC |
| Axicabtagene ciloleucel | Yescarta | Diffuse large/high-grade B-cell lymphoma | 09-06-2022 | 03-02-2023 | RCCC |
| Lumasiran | Oxlumo | Primary hyperoxaluria type 1 | 10-05-2022 | 08-02-2023 | RCCC |
| Berotralstat | Orladeyo | Hereditary angioedema | 22-02-2022 | 17-02-2023 | RCCC |
| Ravulizumab | Ultomiris | Atypical hemolytic uremic syndrome | 08-06-2022 | 27-02-2023 | RCCC |
| Olaparib | Lynparza | gBRCAm HER2- breast cancer | 03-08-2022 | 01-03-2023 | RCCC |
| Amivantamab | Rybrevant | NSCLC | 21-04-2022 | 01-03-2023 | RCCC |
| Lutetium vipivotide tetraxetan | Pluvicto | CRPC | 21-07-2022 | 03-03-2023 | RCCC |
| Finerenone | Kerendia | Chronic kidney disease | 20-05-2022 | 08-03-2023 | RCCC |
| Pegcetacoplan | Empaveli | PNH | 26-08-2022 | 20-03-2023 | RCCC |
| Brexucabtagene autoleucel | Tecartus | Acute lymphoblastic leukemia | 16-09-2022 | 29-03-2023 | RCCC |
| Nivolumab | Opdivo | NSCLC | 13-09-2022 | 30-03-2023 | RCCC |
| Caplacizumab | Cablivi | TTP | 07-06-2022 | 05-04-2023 | DNR |
| Mavacamten | Camzyos | Obstructive hypertrophic cardiomyopathy | 22-09-2022 | 14-04-2023 | RCCC |
| Crisantaspase | Rylaze | Acute lymphoblastic leukemia | 18-08-2022 | 26-04-2023 | RCCC |
| Ciltacabtagene autoleucel | Carvykti | Multiple myeloma | 23-09-2022 | 01-05-2023 | RCCC |
| Selumetinib | Koselugo | Neurofibromatosis type 1 | 28-10-2022 | 10-05-2023 | RCCC |
| Fostemsavir | Rukobia | HIV-1 | 28-10-2022 | 10-05-2023 | RCCC |
| Upadacitinib | Rinvoq | Ankylosing spondylitis | 17-10-2022 | 11-05-2023 | RCCC |
| Palovarotene | Sohonos | Fibrodysplasia ossificans progressiva | 21-10-2022 | 11-05-2023 | RCCC |
| Risankizumab | Skyrizi | Crohn's disease | 28-10-2022 | 12-05-2023 | RCCC |
| Atogepant | Qulipta | Migraine | 23-02-2022 | 14-06-2023 | RCCC |
| Vericiguat | Verquvo | Heart failure | 14-10-2022 | 14-06-2023 | RCCC |
| Foslevodopa/foscarbidopa | Vyalev | Parkinson's disease | 23-11-2022 | 16-06-2023 | RCCC |
| Trastuzumab deruxtecan | Enhertu | HER2-low breast cancer | 13-12-2022 | 29-06-2023 | RCCC |
| Difelikefalin | Korsuva | Chronic kidney disease | 22-09-2022 | 13-07-2023 | DNR |
| Deucravacitinib | Sotyktu | Plaque psoriasis | 27-09-2022 | 08-08-2023 | DNR |
| Ravulizumab | Ultomiris | AChR+ generalized myasthenia gravis | 25-10-2022 | 08-08-2023 | DNR |
| Cariprazine | Vraylar | Schizophrenia | 29-10-2021 | 10-08-2023 | DNR |
| Avacopan | Tavneos | Antineutrophil cytoplasmic antibody vasculitis | 14-10-2022 | 10-08-2023 | DNR |
| Roflumilast | Zoryve | Plaque psoriasis | 02-02-2023 | 16-08-2023 | RCCC |
| Cenobamate | Xcopri | Partial-onset seizure epilepsy | 07-02-2023 | 29-08-2023 | RCCC |
| Upadacitinib | Rinvoq | Ulcerative colitis | 18-04-2022 | 01-09-2023 | RCCC |
| Belzutifan | Welireg | Von Hippel-Lindau disease tumour | 23-01-2023 | 01-09-2023 | RCCC |
| Zanubrutinib | Brukinsa | Chronic lymphocytic leukemia | 20-01-2023 | 01-09-2023 | RCCC |
| Tisagenlecleucel | Kymriah | Follicular lymphoma | 01-02-2023 | 01-09-2023 | RCCC |
| Dupilumab | Dupixent | Atopic dermatitis | 29-03-2023 | 13-10-2023 | RCCC |
| Setmelanotide | Imcivree | Bardet-Biedl syndrome | 07-03-2023 | 16-10-2023 | RCCC |
| Ibrutinib | Imbruvica | Chronic lymphocytic leukemia | 21-04-2023 | 02-11-2023 | RCCC |
| Axicabtagene ciloleucel | Yescarta | Follicular lymphoma | 13-04-2023 | 02-11-2023 | RCCC |
| Durvalumab/tremelimumab | Imfinzi/Imjudo | Hepatocellular carcinoma | 15-12-2022 | 03-11-2023 | RCCC |
| Cabozantinib | Cabometyx | Renal cell carcinoma | 17-02-2023 | 03-11-2023 | RCCC |
| Mirikizumab | Omvoh | Ulcerative colitis | 07-03-2023 | 16-11-2023 | RCCC |
| Somapacitan | Sogroya | Growth hormone deficiency | 27-04-2023 | 17-11-2023 | RCCC |
| Elexacaftor/tezacaftor/ivacaftor & ivacaftor | Trikafta | CF, F508del mutation, 2 years & older | 10-05-2023 | 24-11-2023 | RCCC |
| Andexanet alfa | Ondexxya | Reverse FXa inhibitor anticoagulant effect | 02-03-2023 | 05-12-2023 | DNR |
| Upadacitinib | Rinvoq | Crohn’s disease | 05-06-2023 | 14-12-2023 | RCCC |
| Efgartigimod alfa | Vyvgart | Generalized myasthenia gravis | 09-05-2023 | 14-12-2023 | RCCC |
| Polatuzumab vedotin | Polivy | Large B-cell lymphoma | 01-03-2023 | 20-12-2023 | DNR |
| Calaspargase pegol | Asparlas | Acute lymphoblastic leukemia | 12-05-2023 | 04-01-2024 | RCCC |
| Ibrutinib | Imbruvica | Waldenstrom's macroglobulinemia | 20-06-2023 | 05-01-2024 | RCCC |
| Evinacumab | Evkeeza | Homozygous familial hypercholesterolemia | 10-05-2023 | 12-01-2024 | RCCC |
| Vutrisiran | Amvuttra | Hereditary transthyretin mediated amyloidosis | 04-07-2023 | 29-01-2024 | RCCC |
| Olaparib | Lynparza | CRPC | 19-05-2023 | 31-01-2024 | RCCC |
| Niraparib/abiraterone | Akeega | CRPC | 14-06-2023 | 01-02-2024 | RCCC |
| Sacituzumab govitecan | Trodelvy | HR+ HER2- breast cancer | 18-07-2023 | 01-02-2024 | RCCC |
| Glofitamab | Columvi | Diffuse large B-cell lymphoma | 18-07-2023 | 02-02-2024 | RCCC |
| Nivolumab/relatlimab | Opdualag | Melanoma | 10-07-2023 | 02-02-2024 | RCCC |
| Odevixibat | Bylvay | Progressive familial intrahepatic cholestasis | 23-06-2023 | 13-02-2024 | RCCC |
| Belumosudil | Rezurock | Graft versus host disease | 26-07-2023 | 15-02-2024 | RCCC |
| Fidanacogene elaparvovec | Beqvez | Hemophilia B | 01-08-2023 | 16-02-2024 | RCCC |
| Treosulfan | Trecondyv | Acute myeloid leukemia/myelodysplastic syndrome | 14-07-2023 | 28-02-2024 | RCCC |
| Sotorasib | Lumakras | KRAS G12C NSCLC | 19-08-2022 | 29-02-2024 | DNR |
| Trifluridine/tipiracil | Lonsurf | Colorectal cancer | 15-08-2023 | 29-02-2024 | RCCC |
| Ravulizumab | Ultomiris | NMOSD | 29-08-2023 | 13-03-2024 | RCCC |
| Inebilizumab | Uplizna | NMOSD | 18-08-2023 | 13-03-2024 | RCCC |
| Drospirenone | Slynd | Contraceptive | 14-08-2023 | 18-03-2024 | RCCC |
| Teclistamab | Tecvayli | Multiple myeloma | 31-08-2023 | 08-04-2024 | RCCC |
| Cannabidiol | Epidiolex | Lennox-Gastaut syndrome | 20-09-2023 | 18-04-2024 | RCCC |
| Cannabidiol | Epidiolex | Dravet syndrome | 25-09-2023 | 18-04-2024 | RCCC |
| Cannabidiol | Epidiolex | Tuberous sclerosis complex seizures | 29-09-2023 | 18-04-2024 | RCCC |
| Etranacogene dezaparvovec | Hemgenix | Hemophilia B | 04-10-2023 | 19-04-2024 | RCCC |
| Inclisiran | Leqvio | Primary hypercholesterolemia | 19-09-2023 | 22-04-2024 | DNR |
| Maralixibat | Livmarli | Alagille syndrome | 05-05-2023 | 22-04-2024 | RCCC |
| Infliximab | Remsima | Ulcerative colitis | 04-10-2023 | 22-04-2024 | RCCC |
| Infliximab | Remsima | Crohn’s disease | 04-10-2023 | 22-04-2024 | RCCC |
| Cemiplimab | Libtayo | NSCLC | 27-09-2023 | 02-05-2024 | RCCC |
| Dostarlimab | Jemperli | Endometrial cancer | 18-10-2023 | 03-05-2024 | RCCC |
| Tralokinumab | Adtralza | Atopic dermatitis | 05-06-2023 | 08-05-2024 | DNR |
| Avatrombopag | Doptelet | Chronic immune thrombocytopenia | 03-02-2022 | 08-05-2024 | DNR |
| Metreleptin | Myalepta | Leptin deficiency in lipodystrophy | 25-07-2023 | 09-05-2024 | RCCC |
| Bimekizumab | Bimzelx | Psoriatic arthritis | 05-10-2023 | 15-05-2024 | RCCC |
| Bimekizumab | Bimzelx | Ankylosing spondylitis | 19-10-2023 | 16-05-2024 | RCCC |
| Insulin icodec | Awiqli | Diabetes mellitus, type 2 | 18-10-2023 | 17-05-2024 | RCCC |
| Nivolumab | Opdivo | Melanoma IIB or IIC | 06-11-2023 | 29-05-2024 | RCCC |
| Elranatamab | Elrexfio | Multiple myeloma | 09-11-2023 | 31-05-2024 | RCCC |
| Epcoritamab | Epkinly | Diffuse large B-cell lymphoma | 14-11-2023 | 31-05-2024 | TLR |
| Aflibercept | Eylea HD | Diabetic macular edema | 18-08-2023 | 05-06-2024 | RCCC |
| Aflibercept | Eylea HD | Macular degeneration | 18-08-2023 | 05-06-2024 | RCCC |
| Pembrolizumab | Keytruda | GGEJ carcinoma | 22-11-2023 | 26-06-2024 | RCCC |
| Pembrolizumab | Keytruda | Biliary tract carcinoma | 07-12-2023 | 11-07-2024 | RCCC |
| Atogepant | Qulipta | Migraine | 21-12-2023 | 15-07-2024 | RCCC |
| Relugolix | Orgovyx | Prostate cancer | 14-11-2023 | 22-07-2024 | RCCC |
| Evolocumab | Repatha | Primary hyperlipidemia | 29-11-2023 | 08-08-2024 | RCCC |
| Cabotegravir | Apretude | HIV-1 infection | 01-02-2024 | 14-08-2024 | RCCC |
| Etrasimod | Velsipity | Ulcerative colitis | 05-02-2024 | 14-08-2024 | RCCC |
| Inclisiran | Leqvio | Primary hypercholesterolemia | 19-09-2023 | 15-08-2024 | RCCC |
| Cariprazine | Vraylar | Schizophrenia | 20-12-2023 | 15-08-2024 | RCCC |
| Remdesivir | Veklury | COVID-19 (hospitalized) | 01-03-2024 | 16-08-2024 | RCCC |
| Remdesivir | Veklury | COVID-19 (non-hospitalized) | 01-03-2024 | 16-08-2024 | RCCC |
| Brentuximab | Adcetris | Hodgkin lymphoma | 18-04-2024 | 29-08-2024 | RCCC |
| Capivasertib | Truqap | HR+ HER2- breast cancer | 14-02-2024 | 30-08-2024 | RCCC |
| Secukinumab | Cosentyx | Hidradenitis suppurativa | 10-05-2023 | 12-09-2024 | RCCC |
| Baricitinib | Olumiant | Alopecia areata | 04-03-2024 | 13-09-2024 | RCCC |
| Osimertinib | Tagrisso | NSCLC | 11-12-2023 | 03-10-2024 | RCCC |
| Abemaciclib | Verzenio | HR+ HER2- breast cancer | 09-02-2024 | 03-10-2024 | RCCC |
| Pembrolizumab | Keytruda | GGEJ carcinoma | 13-03-2024 | 04-10-2024 | RCCC |
| Ivosidenib | Tibsovo | Acute myeloid leukemia | 19-03-2024 | 04-10-2024 | RCCC |
| Lebrikizumab | Ebglyss | Atopic dermatitis | 01-11-2023 | 09-10-2024 | DNR |
| Burosumab | Crysvita | X-linked hypophosphatemia | 02-01-2024 | 10-10-2024 | RCCC |
| Elexacaftor/tezacaftor/ivacaftor & ivacaftor | Trikafta | CF, F508del mutation, 2 years and older | 05-03-2024 | 17-10-2024 | RCCC |
| Clindamycin/benzoyl/adapalene | Cabtreo | Acne vulgaris | 08-03-2024 | 18-10-2024 | RCCC |
| Danicopan | Voydeya | PNH | 04-04-2024 | 18-10-2024 | RCCC |
| Eplontersen | Wainua | Hereditary transthyretin-mediated amyloidosis | 09-04-2024 | 21-10-2024 | RCCC |
| Sotatercept | Winrevair | Pulmonary arterial hypertension | 08-04-2024 | 21-10-2024 | RCCC |
| Alectinib | Alecensaro | ALK+ NSCLC | 18-04-2024 | 30-10-2024 | RCCC |
| Avapritinib | Ayvakyt | Systemic mastocytosis | 19-04-2024 | 31-10-2024 | RCCC |
| Ciltacabtagene autoleucel | Carvykti | Multiple myeloma | 18-04-2024 | 01-11-2024 | RCCC |
| Lisocabtagene maraleucel | Breyanzi | Large B-cell lymphoma | 08-05-2024 | 27-11-2024 | RCCC |
| Fruquintinib | Fruzaqla | Colorectal cancer | 22-05-2024 | 27-11-2024 | RCCC |
| Venetoclax | Venclexta | Chronic lymphocytic leukemia | 22-05-2024 | 28-11-2024 | RCCC |
| Enfortumab | Padcev | Urothelial cancer | 22-05-2024 | 29-11-2024 | RCCC |
| Exagamglogene autotemcel | Casgevy | Sickle cell disease | 27-05-2024 | 11-12-2024 | RCCC |
| Exagamglogene autotemcel | Casgevy | Transfusion-dependent beta-thalassemia | 27-05-2024 | 11-12-2024 | RCCC |
| Ferric carboxymaltose | Ferinject | Iron deficiency anemia | 10-05-2024 | 11-12-2024 | RCCC |
| Spesolimab | Spevigo | Generalized pustular psoriasis | 04-06-2024 | 12-12-2024 | RCCC |
| Ravulizumab | Ultomiris | Generalized myasthenia gravis | 04-06-2024 | 17-12-2024 | RCCC |

AChR+: Anti-acetylcholine receptor antibody-positive; CF: Cystic fibrosis; CRPC: Castration-resistant prostate cancer; CSPC: Castration-sensitive prostate cancer; DNR: Do not reimburse; EGEJ: Esophageal/gastroesophageal junction; GEP-NET: Gastroenteropancreatic neuroendocrine tumour; GGEJ: Gastric/gastroesophageal junction; MRD+: Minimal residual disease-positive; NMOSD: Neuromyelitis optica spectrum disorder; NSCLC: Non-small-cell lung cancer; Ph+: Philadelphia chromosome-positive; PNH: Paroxysmal nocturnal hemoglobinuria; R: Reimburse; RCCC: Reimburse with clinical criteria and/or conditions; TLR: Time-limited recommendation; TTP: Thrombotic thrombocytopenic purpura
